# Supplementary material for: Combined Treatment With Prednisone and Bromocriptine Does Not Influence the Pregnancy Outcome in Fresh Embryo Transfer Cycles: a Retrospective Study
Source: Research Square preprint supplement (doi:10.21203/rs.3.rs-122467/v1), 2020-12-11
Supplement: Supplementary file 1 [file 9ff4c2e27a055f5b8986bb53.docx]

**Supplement Figure 1.** Flow chart and schematic overview

**Pregnancy outcome**

**Follow-up**

**For other reasons (N=463)**

**For OHSS (N=841)**

**Embryo transfer analysis**

**For OHSS (N=648)**

**For other reasons (N=563)**

**ET cancellation**

**cycles (N=1304)**

**ET cycles (N=753)**

**ET cycles (N=846)**

**ET cancellation cycles (N=1211)**

**single-treatment group (N=2057)**

**combined-treatment group (N=2057)**

**Cycles eligible for study (N=4114)**

**Inclusion criteria:**

(1) infertility couples

(2) IVF/ICSI treatments

(3) E2 ≥4800pg/ml on trigger day

(4) prednisone and/or bromocriptine treatments

**patients with IVF/ICSI**

**(N=5235)**

**exclusion criteria:**

(1) cycles canceled prior to oocyte retrieval

(2) cycles with oocyte donation or sperm donation

(3) abnormal liver function or kidney function

(4) incomplete follow-up or medical records
